# Supplementary material for: Dietary Protein Quality Affects the Interplay between Gut Microbiota and Host Performance in Nile Tilapia
Source: MDPI journal article supplement (doi:10.3390/ani14050714), 2024-02-24
Supplement: s1 [file s1]

## Supplementary material

### Figures:

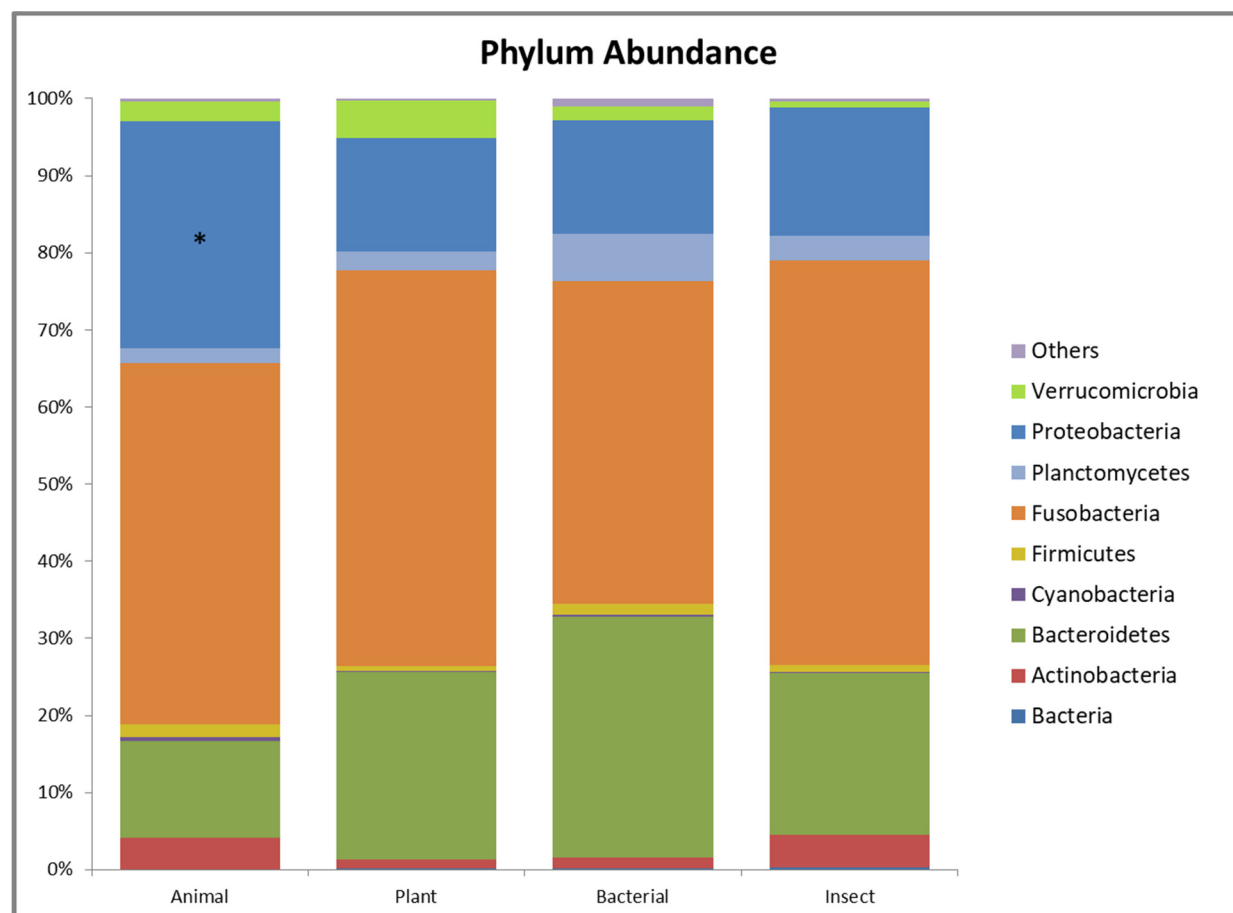

**Figure S1:** Percentage of abundance at phylum and genus level for tilapia fed diets containing different protein sources: Animal, insect, Plant and Bacterial. Legend represents the most abundant phyla for each treatment.

### Tables:

**Table S1:** Absolute values for amino acid intake per treatment.

| Amino Acids | Intake (mg/fish/day) |       |           |        |
|-------------|----------------------|-------|-----------|--------|
|             | ANIMAL               | PLANT | BACTERIAL | INSECT |
| Arg         | 36.27                | 33.43 | 36.18     | 33.65  |
| His         | 12.77                | 11.89 | 10.95     | 10.56  |
| Ile         | 18.30                | 19.16 | 18.94     | 18.04  |
| Leu         | 37.83                | 41.96 | 38.49     | 41.02  |
| Lys         | 26.42                | 24.71 | 27.45     | 29.01  |
| Thr         | 18.79                | 17.74 | 27.12     | 19.31  |
| Trp         | 4.09                 | 4.15  | 4.45      | 4.13   |
| Val         | 21.37                | 21.57 | 22.08     | 22.79  |
| Met         | 10.95                | 11.24 | 12.91     | 11.59  |
| Cys         | 6.18                 | 5.86  | 5.25      | 6.64   |
| Phe         | 24.73                | 26.13 | 23.25     | 23.63  |

|     |       |       |       |       |
|-----|-------|-------|-------|-------|
| Tyr | 21.93 | 24.69 | 21.08 | 21.68 |
| Asx | 32.27 | 32.57 | 34.14 | 33.82 |
| Glx | 64.61 | 78.88 | 67.94 | 71.75 |
| Ala | 24.81 | 23.81 | 26.07 | 25.53 |
| Gly | 33.97 | 25.80 | 30.40 | 30.87 |
| Pro | 30.58 | 33.08 | 28.35 | 31.74 |
| Ser | 20.09 | 21.59 | 19.81 | 24.07 |

**Table S2:** Whole body composition of fish under the dietary treatments.

| Diet      | Fresh matter |           |             |           |               |
|-----------|--------------|-----------|-------------|-----------|---------------|
|           | Moisture (%) | Ash (%)   | Protein (%) | Fat (%)   | Energy (kJ/g) |
| Initial   | 76.28        | 4.26      | 14.99       | 4.07      | 4.88          |
| ANIMAL    | 73.93±0.42   | 3.12±0.18 | 14.80±0.34  | 6.99±0.23 | 6.07±0.07     |
| PLANT     | 73.90±0.85   | 3.16±0.03 | 14.70±0.63  | 7.18±0.12 | 6.12±0.18     |
| BACTERIAL | 73.99±0.46   | 3.61±0.35 | 14.67±0.44  | 6.61±0.23 | 5.94±0.12     |
| INSECT    | 74.53±0.63   | 3.16±0.19 | 14.60±0.64  | 6.44±0.13 | 5.82±0.17     |

**Table S3:** DADA2 table output

| sample-id      | Treatments | input | filtered | % of input<br>passed filter | denoised | merged | % of input<br>merged | non-chimeric | % of input non-<br>chimeric |
|----------------|------------|-------|----------|-----------------------------|----------|--------|----------------------|--------------|-----------------------------|
| S20-31-1-V1V2  | Animal     | 65361 | 43059    | 65.88                       | 42695    | 41815  | 63.98                | 28473        | 43.56                       |
| S20-31-10-V1V2 | Plant      | 74653 | 51726    | 69.29                       | 51062    | 49332  | 66.08                | 40537        | 54.3                        |
| S20-31-11-V1V2 | Plant      | 73776 | 53734    | 72.83                       | 53000    | 50676  | 68.69                | 36095        | 48.93                       |
| S20-31-12-V1V2 | Plant      | 84180 | 59461    | 70.64                       | 58528    | 55781  | 66.26                | 40487        | 48.1                        |
| S20-31-13-V1V2 | Animal     | 88619 | 60274    | 68.01                       | 59193    | 56472  | 63.72                | 43155        | 48.7                        |
| S20-31-14-V1V2 | Animal     | 67321 | 47629    | 70.75                       | 47233    | 46029  | 68.37                | 30943        | 45.96                       |
| S20-31-15-V1V2 | Animal     | 63888 | 32119    | 50.27                       | 31854    | 31338  | 49.05                | 21373        | 33.45                       |
| S20-31-16-V1V2 | Bacterial  | 12371 | 81867    | 66.17                       | 80707    | 77695  | 62.8                 | 60910        | 49.23                       |
| S20-31-17-V1V2 | Bacterial  | 84987 | 62793    | 73.89                       | 61964    | 57777  | 67.98                | 34241        | 40.29                       |
| S20-31-18-V1V2 | Bacterial  | 87991 | 43759    | 49.73                       | 43345    | 42244  | 48.01                | 29282        | 33.28                       |
| S20-31-19-V1V2 | Insect     | 76437 | 55109    | 72.1                        | 54322    | 50400  | 65.94                | 33902        | 44.35                       |
| S20-31-2-V1V2  | Animal     | 58065 | 31359    | 54.01                       | 30898    | 29589  | 50.96                | 20574        | 35.43                       |
| S20-31-20-V1V2 | Insect     | 10713 | 31671    | 29.56                       | 31371    | 30959  | 28.9                 | 22470        | 20.97                       |
| S20-31-21-V1V2 | Insect     | 56981 | 37977    | 66.65                       | 37613    | 36502  | 64.06                | 29717        | 52.15                       |
| S20-31-22-V1V2 | Plant      | 63715 | 44995    | 70.62                       | 44456    | 42967  | 67.44                | 31679        | 49.72                       |
| S20-31-23-V1V2 | Plant      | 40893 | 25787    | 63.06                       | 25482    | 24614  | 60.19                | 19473        | 47.62                       |
| S20-31-24-V1V2 | Plant      | 99616 | 74154    | 74.44                       | 73336    | 68780  | 69.05                | 42222        | 42.38                       |
| S20-31-25-V1V2 | Animal     | 62697 | 46641    | 74.39                       | 45609    | 43345  | 69.13                | 26409        | 42.12                       |
| S20-31-26-V1V2 | Animal     | 52954 | 37693    | 71.18                       | 36883    | 35157  | 66.39                | 25936        | 48.98                       |
| S20-31-27-V1V2 | Animal     | 51596 | 31574    | 61.19                       | 31139    | 30160  | 58.45                | 26060        | 50.51                       |
| S20-31-28-V1V2 | Bacterial  | 66053 | 49000    | 74.18                       | 48345    | 45724  | 69.22                | 27647        | 41.86                       |
| S20-31-29-V1V2 | Bacterial  | 61913 | 39740    | 64.19                       | 39189    | 37920  | 61.25                | 25963        | 41.93                       |
| S20-31-3-V1V2  | Animal     | 55504 | 30152    | 54.32                       | 29935    | 29369  | 52.91                | 19833        | 35.73                       |
| S20-31-30-V1V2 | Bacterial  | 61983 | 45692    | 73.72                       | 45026    | 43055  | 69.46                | 28294        | 45.65                       |
| S20-31-31-V1V2 | Insect     | 49172 | 34598    | 70.36                       | 34148    | 32022  | 65.12                | 18318        | 37.25                       |
| S20-31-32-V1V2 | Insect     | 89435 | 64527    | 72.15                       | 63848    | 61559  | 68.83                | 41641        | 46.56                       |

|                |           |        |       |       |       |       |       |       |       |
|----------------|-----------|--------|-------|-------|-------|-------|-------|-------|-------|
| S20-31-33-V1V2 | Insect    | 65507  | 49563 | 75.66 | 48990 | 47076 | 71.86 | 30249 | 46.18 |
| S20-31-34-V1V2 | Plant     | 65767  | 49341 | 75.02 | 48651 | 46343 | 70.47 | 28455 | 43.27 |
| S20-31-35-V1V2 | Plant     | 52733  | 35874 | 68.03 | 35456 | 34081 | 64.63 | 28858 | 54.72 |
| S20-31-36-V1V2 | Plant     | 76281  | 51974 | 68.13 | 51114 | 48694 | 63.84 | 33877 | 44.41 |
| S20-31-4-V1V2  | Bacterial | 63161  | 45839 | 72.57 | 45549 | 43250 | 68.48 | 31674 | 50.15 |
| S20-31-5-V1V2  | Bacterial | 53890  | 40868 | 75.84 | 40750 | 39859 | 73.96 | 31914 | 59.22 |
| S20-31-6-V1V2  | Bacterial | 65243  | 44027 | 67.48 | 43762 | 42751 | 65.53 | 24744 | 37.93 |
| S20-31-7-V1V2  | Insect    | 45853  | 32869 | 71.68 | 32698 | 31604 | 68.92 | 26115 | 56.95 |
| S20-31-8-V1V2  | Insect    | 110255 | 74680 | 67.73 | 73368 | 70675 | 64.1  | 49777 | 45.15 |
| S20-31-9-V1V2  | Insect    | 50559  | 38391 | 75.93 | 38024 | 36784 | 72.75 | 26320 | 52.06 |

---

**Table S4:** Permanova values for weighted and unweighted Unifrac.

| Group 1                   | Group 2   | Sample size | Permutations | pseudo-F | p-value | q-value |
|---------------------------|-----------|-------------|--------------|----------|---------|---------|
| <b>Unweighted-Unifrac</b> |           |             |              |          |         |         |
| Animal                    | Insect    | 18          | 999          | 1.127    | 0.272   | 0.3432  |
|                           | Bacterial | 18          | 999          | 1.283    | 0.152   | 0.3432  |
|                           | Plant     | 18          | 999          | 1.119    | 0.286   | 0.3432  |
| Insect                    | Bacterial | 18          | 999          | 0.940    | 0.485   | 0.485   |
|                           | Plant     | 18          | 999          | 1.432    | 0.098   | 0.3432  |
| Bacterial                 | Plant     | 18          | 999          | 1.241    | 0.175   | 0.3432  |
| <b>Weighted-Unifrac</b>   |           |             |              |          |         |         |
| Animal                    | Insect    | 18          | 999          | 0.838    | 0.461   | 0.564   |
|                           | Bacterial | 18          | 999          | 2.124    | 0.077   | 0.231   |
|                           | Plant     | 18          | 999          | 2.535    | 0.051   | 0.231   |
| Insect                    | Bacterial | 18          | 999          | 0.728    | 0.556   | 0.564   |
|                           | Plant     | 18          | 999          | 0.720    | 0.564   | 0.564   |
| Bacterial                 | Plant     | 18          | 999          | 0.825    | 0.472   | 0.564   |

**Table S5:** Abundance of the predicted pathways that evidenced correlation with amino acid intake in the three diets when compared with ANIMAL.

| ANIMAL vs PLANT                                |                                  |        |           |  |
|------------------------------------------------|----------------------------------|--------|-----------|--|
| Pathway                                        | Superclass                       | ANIMAL | PLANT     |  |
| 4-aminobutanoate degradation V                 | Amine and Polyamine Degradation  | 0,12   | 0,07      |  |
| creatinine degradation II                      | Amine and Polyamine Degradation  | 0,00   | 0,00      |  |
| aromatic biogenic amine degradation (bacteria) | Amine and Polyamine Degradation  | 0,11   | 0,05      |  |
| L-arginine biosynthesis                        | Amino Acid Biosynthesis          | 0,42   | 0,35      |  |
| L-glutamate and L-glutamine biosynthesis       | Amino Acid Biosynthesis          | 0,12   | 0,12      |  |
| L-isoleucine biosynthesis                      | Amino Acid Biosynthesis          | 0,33   | 0,34      |  |
| L-lysine biosynthesis I                        | Amino Acid Biosynthesis          | 0,69   | 0,77      |  |
| L-histidine degradation I                      | Amino Acid Degradation           | 0,46   | 0,45      |  |
| L-leucine degradation I                        | Amino Acid Degradation           | 0,14   | 0,09      |  |
| L-lysine fermentation to acetate and butanoate | Amino Acid Degradation           | 0,43   | 0,50      |  |
| pyruvate fermentation to butanoate             | Fermentation                     | 0,12   | 0,16      |  |
| pyruvate fermentation to propanoate I          | Fermentation                     | 0,32   | 0,36      |  |
| mixed acid fermentation                        | Fermentation                     | 0,41   | 0,49      |  |
| ANIMAL vs MICROBIAL                            |                                  |        |           |  |
| Pathway                                        | Superclass                       | ANIMAL | BACTERIAL |  |
| L-histidine biosynthesis                       | Amino Acid Biosynthesis          | 0,31   | 0,39      |  |
| L-isoleucine biosynthesis I (from threonine)   | Amino Acid Biosynthesis          | 0,77   | 0,84      |  |
| L-lysine biosynthesis I                        | Amino Acid Biosynthesis          | 0,60   | 0,62      |  |
| L-methionine biosynthesis I                    | Amino Acid Biosynthesis          | 0,23   | 0,15      |  |
| L-ornithine biosynthesis                       | Amino Acid Biosynthesis          | 0,27   | 0,36      |  |
| L-tryptophan biosynthesis                      | Amino Acid Biosynthesis          | 0,30   | 0,41      |  |
| L-valine biosynthesis                          | Amino Acid Biosynthesis          | 0,78   | 0,84      |  |
| L-histidine degradation I                      | Amino Acid Degradation           | 0,46   | 0,39      |  |
| L-arginine degradation II (AST pathway)        | Amino Acid Degradation           | 0,02   | 0,02      |  |
| glycerol degradation to butanol                | Fermentation                     | 0,11   | 0,06      |  |
| homolactic fermentation                        | Fermentation                     | 0,48   | 0,57      |  |
| heterolactic fermentation                      | Fermentation                     | 0,09   | 0,05      |  |
| 4-aminobutanoate degradation V                 | Amine and Polyamine Degradation  | 0,12   | 0,06      |  |
| aromatic biogenic amine degradation (bacteria) | Amine and Polyamine Degradation  | 0,11   | 0,04      |  |
| allantoin degradation IV (anaerobic)           | Amine and Polyamine Degradation  | 0,02   | 0,01      |  |
| ANIMAL vs INSECT                               |                                  |        |           |  |
| Pathway                                        | Superclass                       | ANIMAL | INSECT    |  |
| superpathway of polyamine biosynthesis II      | Amine and Polyamine Biosynthesis | 0,16   | 0,09      |  |
| 4-aminobutanoate degradation V                 | Amine and Polyamine Degradation  | 0,12   | 0,07      |  |
| allantoin degradation IV (anaerobic)           | Amine and Polyamine Degradation  | 0,02   | 0,01      |  |
| L-arginine biosynthesis                        | Amino Acid Biosynthesis          | 0,32   | 0,22      |  |
| L-isoleucine biosynthesis                      | Amino Acid Biosynthesis          | 0,78   | 0,87      |  |
| L-lysine biosynthesis                          | Amino Acid Biosynthesis          | 0,69   | 0,79      |  |
| L-methionine biosynthesis                      | Amino Acid Biosynthesis          | 0,23   | 0,14      |  |
| L-valine biosynthesis                          | Amino Acid Biosynthesis          | 0,78   | 0,85      |  |
| L-leucine degradation I                        | Amino Acid Degradation           | 0,14   | 0,08      |  |
| glycerol degradation to butanol                | Fermentation                     | 0,11   | 0,06      |  |
